# Supplementary material for: Firearm screening in pediatric patients
Source: PubMed Central journal article supplement (PMC11228932; doi:10.3389/fped.2024.1415612), 2024-06-21
Supplement: Datasheet1.pdf [file Datasheet1.pdf]

**Pediatric Firearm Safety Survey**

**Please note: This survey is for research purposes. Your participation is completely voluntary. If you wish to participate, please complete the answers on this survey. For any concerns, or questions, you may contact Courtney Foster 110 S. Paca St. 8th Floor Baltimore, MD 21201, 410-328-6957. Thank you!**

Age \_\_\_\_\_

Sex \_\_\_\_\_

Race \_\_\_\_\_

Zip Code \_\_\_\_\_

Number of children in your home \_\_\_\_\_

Ages of Child(ren) in home \_\_\_\_\_

How did you enter the hospital?

From the Emergency Department at UMMC

Transferred from another hospital

Do you mind answering questions about guns?                      Yes                      No

Has any other parent asked you if you have a gun in your home before their child came over to play?                      Yes                      No

Do you ask other parents about guns in the homes where your children play?                      Yes                      No

Has any medical provider ever talked to you about gun safety?                      Yes                      No

Do you have a gun/ammunition in your home?                      Yes                      No

Is the gun/ammunition locked?                      Yes                      No

***Thank you so much for your time and participation. Please review this handout for information on firearm safety.***
